# Supplementary material for: Insulin Therapy to Improve BMI in Cystic Fibrosis–Related Diabetes Without Fasting Hyperglycemia: Results of the Cystic Fibrosis Related Diabetes Therapy Trial
Source: PubMed Central journal article supplement — Diabetes Care. 2009 Jul 10;32(10):1783–8. doi: 10.2337/dc09-0585 (PMC2752940; doi:10.2337/dc09-0585), 2009-07-10
Supplement: supp_dc09-0585_Appendices_online.pdf [file supp_dc09-0585_Appendices_online.pdf]

## **Online-Only Appendix A.**

### *The CFRDT Study Group:*

University of Minnesota, Minneapolis (PI-Antoinette Moran, MD)  
Vanderbilt University, Nashville, Tennessee (PI-Bonnie Slovis, MD)  
University of Pittsburgh, Pittsburgh, Pennsylvania (PI-Joseph Pilewski, MD)  
St. Michael's Hospital, Toronto, Canada (PI-Elizabeth Tullis, MD)  
University of Utah, Salt Lake City (PI-Theodore G. Liou, MD)  
University of Vermont, Burlington (PI-Laurie Whittaker, MD)  
Centre Hospitalier de l'Universite de Montreal, Canada (PI- Remi Rabassa Lhoret, MD)  
St. Paul's Hospital, Vancouver, Canada (PI-Stuart Kreisman, MD)  
Stanford University, Palo Alto, California (PI-Richard Moss, MD)  
University of Cambridge, United Kingdom (PI-Amanda Adler, MD)  
University of Florida, Gainesville (PI-Michael Stalvey, MD)  
Children's Mercy Hospital, Kansas City, Missouri (PI-Kurt Midyett, MD)  
Via Christi Specialty Clinic, Wichita, Kansas (PI- Daniel Doornbos, MD)

**Online-Only Appendix B**

Baseline characteristics of all patients enrolled, and by completion status.

|                          | <b>Total Cohort</b> | <b>Completed</b> | <b>Stopped Early</b> |                   |
|--------------------------|---------------------|------------------|----------------------|-------------------|
| Number                   | 100                 | 81               | 19 <sup>§</sup>      | p-value*          |
| OGTT status              |                     |                  |                      | 0.57 <sup>1</sup> |
| CFRD FH-                 | 74 (74%)            | 61 (82%)         | 13 (18%)             |                   |
| IGT                      | 26 (26%)            | 20 (77%)         | 6 (23%)              |                   |
| Treatment Group          |                     |                  |                      | 0.87 <sup>2</sup> |
| Insulin                  | 38 (38%)            | 30 (37%)         | 8 (42%)              |                   |
| Repaglinide              | 31 (31%)            | 26 (32%)         | 6 (32%)              |                   |
| Placebo                  | 31 (31%)            | 25 (31%)         | 5 (26%)              |                   |
| Female                   | 47 (47%)            | 36 (44%)         | 11 (58%)             | 0.29 <sup>2</sup> |
| Age (years)              | 27 ± 8              | 28 ± 1           | 25 ± 2               | 0.19 <sup>3</sup> |
| BMI (kg/m <sup>2</sup> ) | 21.4 ± 3.0          | 21.4 ± 0.3       | 21.4 ± 0.7           | 0.99 <sup>3</sup> |
| % Fat free mass          | 79 ± 10             | 79 ± 1           | 76 ± 2               | 0.23 <sup>3</sup> |
| FVC %predicted           | 88 ± 22             | 89 ± 2           | 83 ± 5               | 0.27 <sup>3</sup> |
| FEV1 %predicted          | 69 ± 25             | 69 ± 3           | 69 ± 6               | 0.93 <sup>3</sup> |
| NIH score                | 82 ± 15             | 83 ± 2           | 77 ± 3               | 0.08              |
| HbA1c (%)                | 6.0 ± 0.7           | 6.0 ± 0.1        | 6.0 ± 0.2            | 0.85 <sup>3</sup> |

Data for the total cohort are presented as mean ± SD; data for the sub-populations as mean ± SEM.

§ Among 19 stopping early, 8 were noncompliant/quit, 5 developed Fasting hyperglycemia, and 6 were stopped for other medical reasons.

\* Tests for differences in baseline characteristics between those stopping early and those completing full study year.

<sup>1</sup> Fisher's Exact Test

<sup>2</sup> Chi-square Test

**Online-Only Appendix C.**

Reasons for Early Drop-Out in the 3 Arms (Insulin, Placebo, Repaglinide) of the CFRDT Trial.

| <b>Reason</b>         | <b>Insulin</b> | <b>Placebo</b> | <b>Repaglinide</b> | <b>Total</b> |
|-----------------------|----------------|----------------|--------------------|--------------|
| Fasting Hyperglycemia | 2              | 3              | 0                  | 5            |
| Other Medical*        | 1              | 1              | 4                  | 6            |
| Patient Quit          | 5              | 2              | 1                  | 8            |
| Total                 | 8              | 6              | 5                  | 19           |

\*Other medical included chronic steroids (1 insulin, 1 repaglinide), pregnancy (1 repaglinide), rash attributed by patient to medication (placebo), patient chronically hospitalized and too ill to take medication (2 repaglinide). Fisher's Exact Test  $p=0.12$  for association of reason for discontinuation with treatment.
